# Supplementary material for: Amberlyst-15 catalysed oxidative esterification of aldehydes using a H2O2trapped oxidant as a terminal oxidant
Source: Royal Society of Chemistry journal article supplement (doi:10.1039/c6nj03831j), 2017-01-01

**Amberlyst-15 catalysed oxidative esterification of aldehydes using H<sub>2</sub>O<sub>2</sub>  
trapped Oxidant as terminal oxidant**

Ek Nath M. Gayakwad<sup>a</sup>, Vilas V. Patil<sup>a</sup>, and Ganapati S. Shankarling<sup>a\*</sup>

**Supporting Information**

<sup>a</sup>Department of Dyestuff Technology, Institute of Chemical Technology, N. P. Marg,  
Matunga, Mumbai - 400019, India Parikh Road, Matunga, Mumbai, Maharashtra, India. E-  
mail: gsshankarling@gmail.com, gs.shankarling@gmail.com

**Table of Contents**

| <b>Sr.No.</b> | <b>Content</b>                                   | <b>Page<br/>no.</b> |
|---------------|--------------------------------------------------|---------------------|
| 1             | <sup>1</sup> H NMR and GC-MS spectra of products | 2-12                |

### 1. <sup>1</sup>H NMR and GC-MS spectra of products

Methyl benzoate (3a):

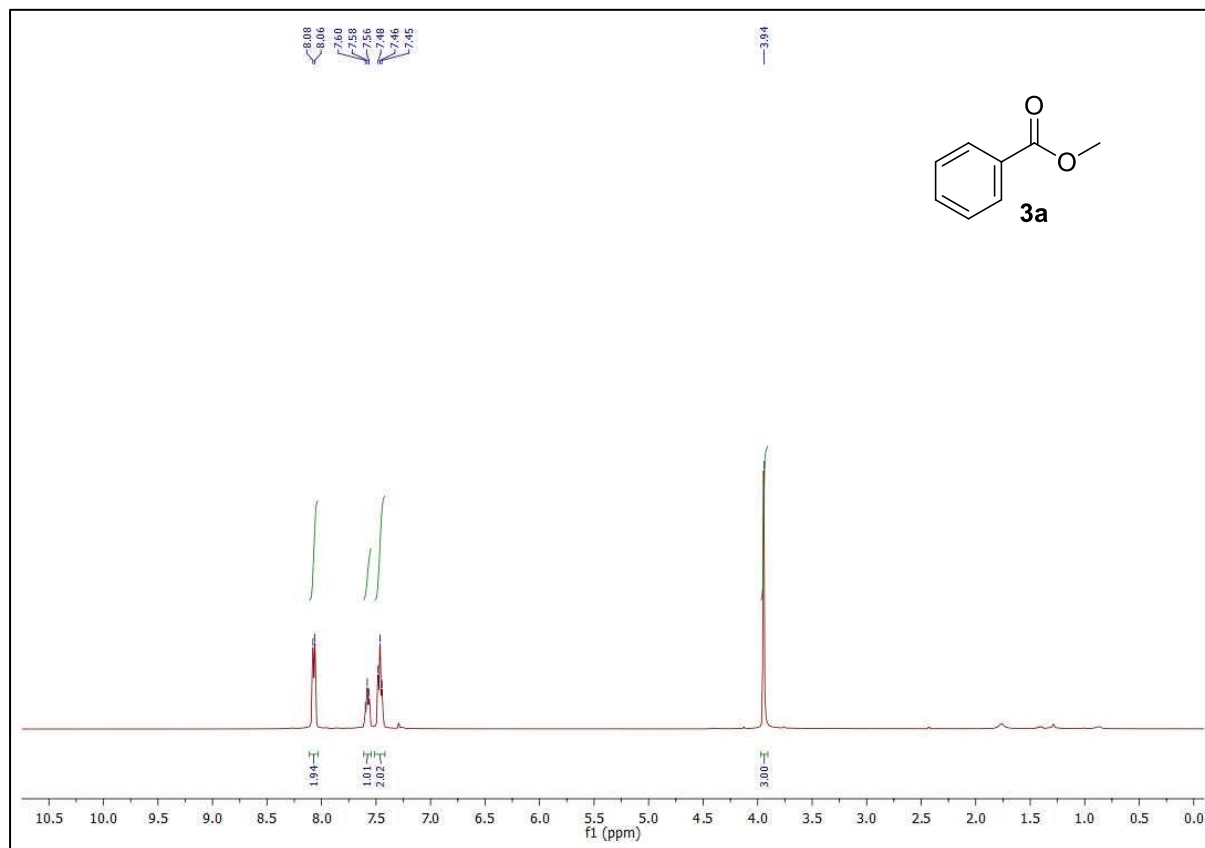

Line#:1 R.Time:3.2(Scan#:40)

MassPeaks:206

RawMode:Averaged 3.2-3.2(39-41) BasePeak:136(49074)

BG Mode:Calc. from Peak

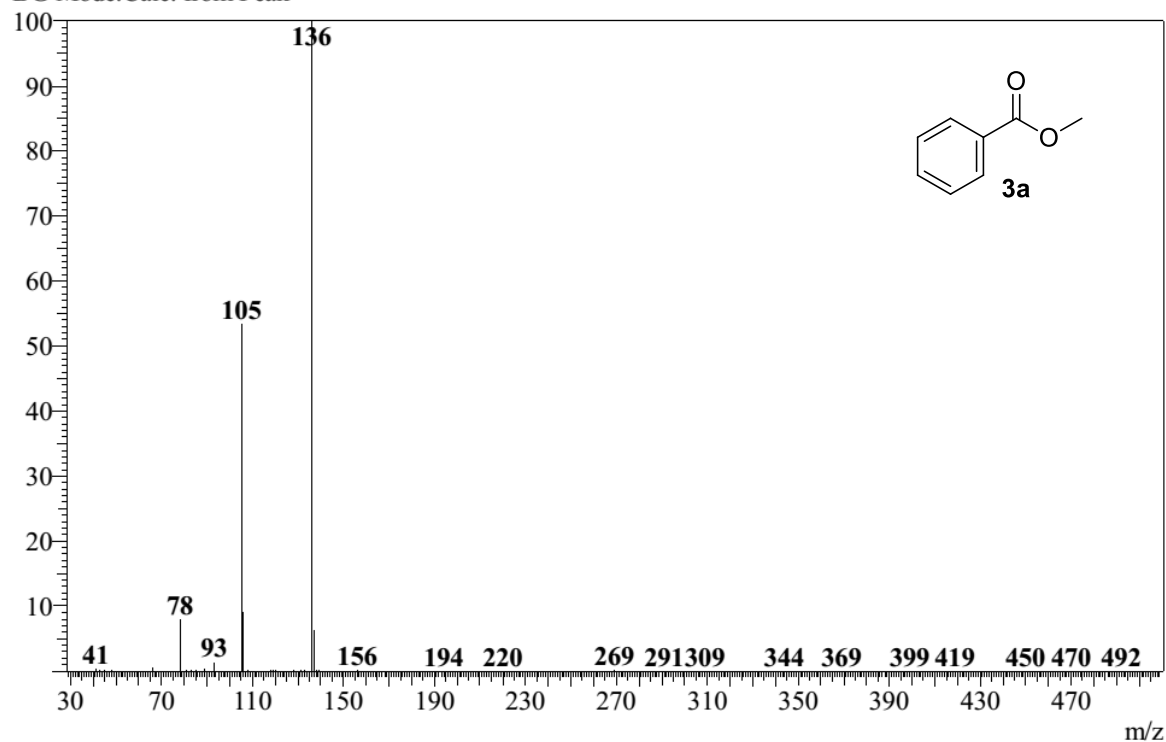

Methyl 4-methyl benzoate (3d):

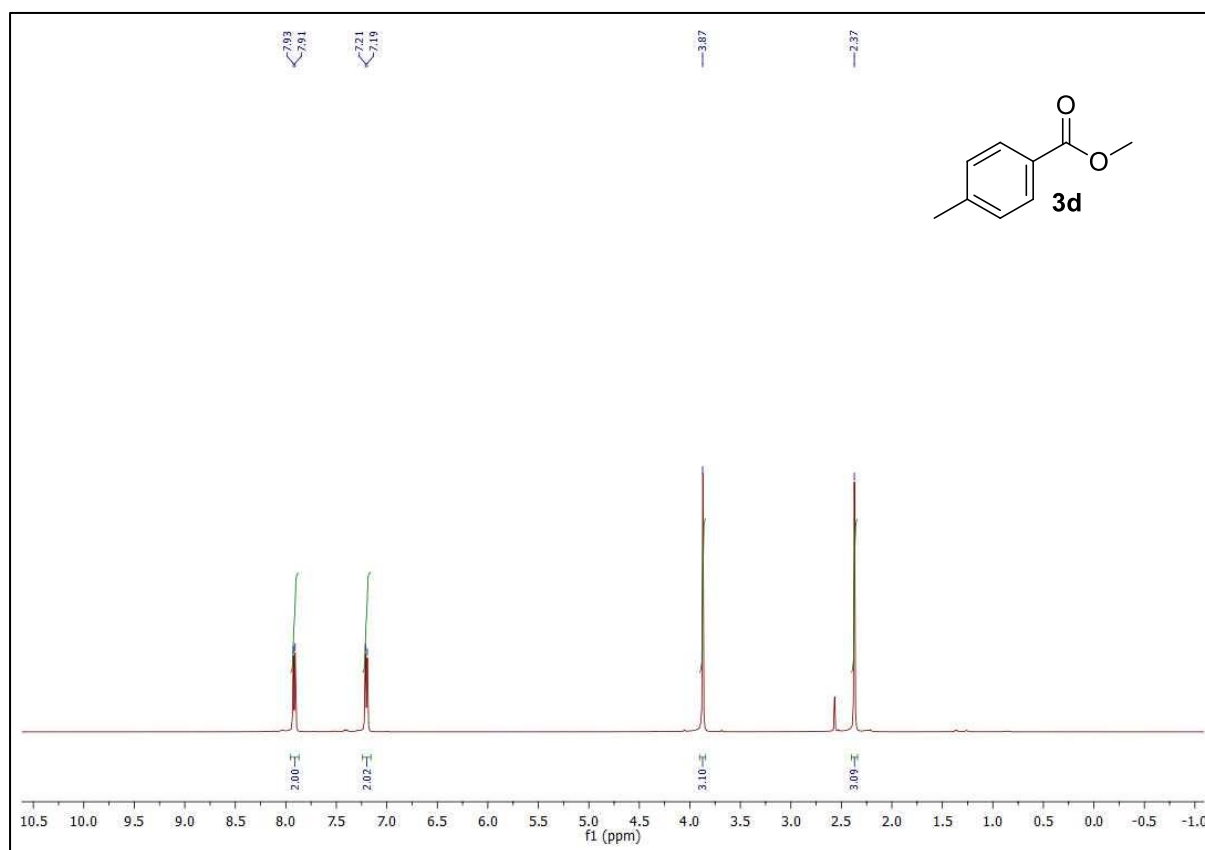

Line#:1 R.Time:4.5(Scan#:310)

MassPeaks:309

RawMode:Averaged 4.5-4.5(309-311) BasePeak:119(8303040)

BG Mode:Calc. from Peak

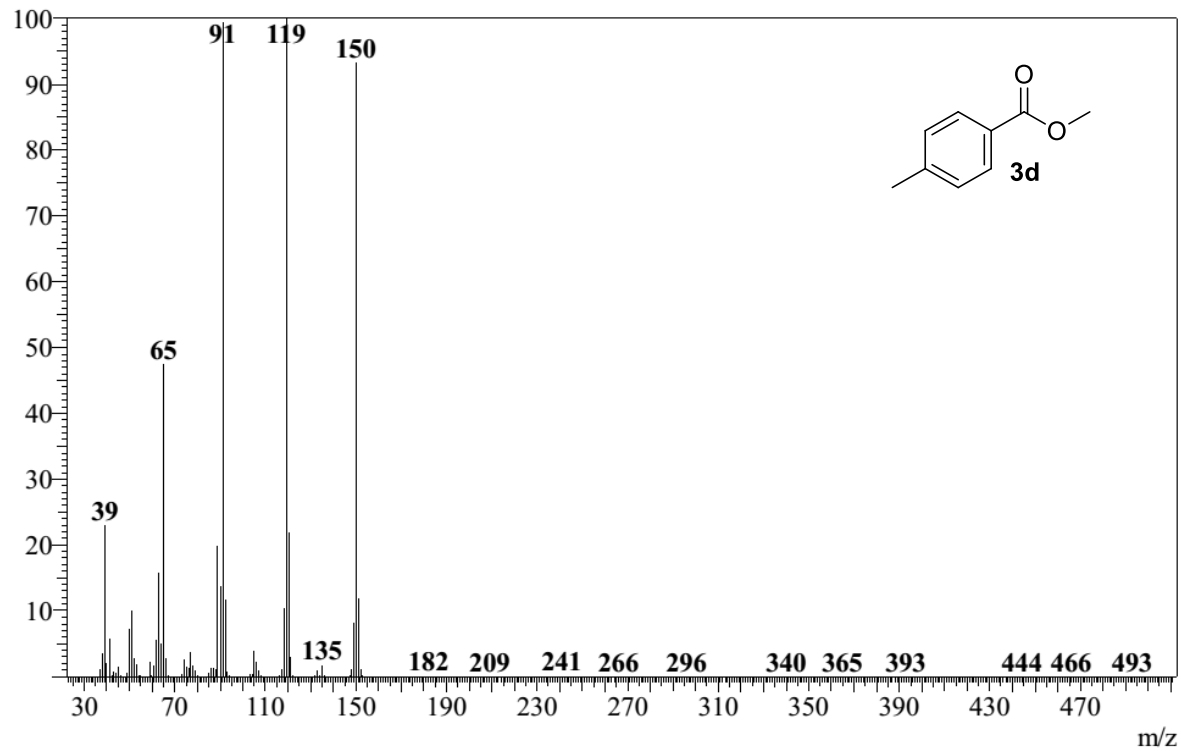

Methyl 4-nitrobenzoate (3g):

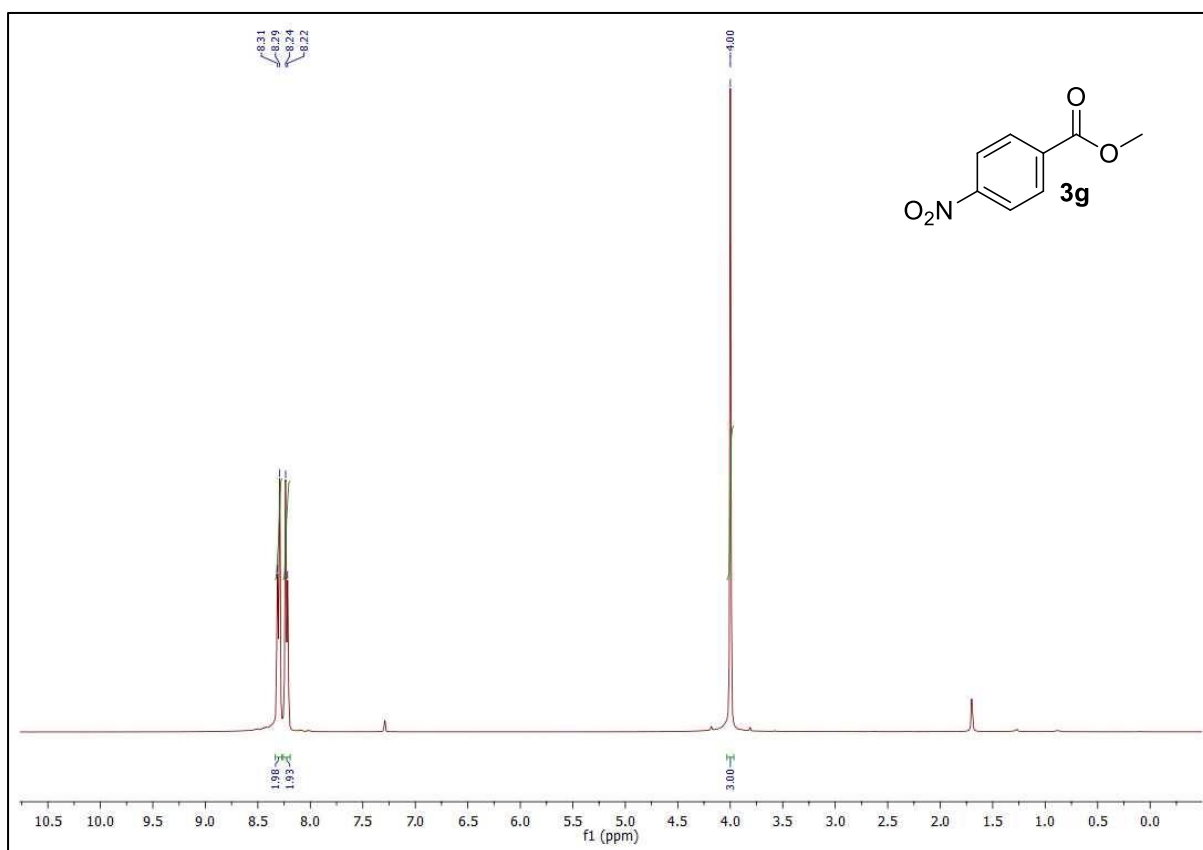

e#:1 R.Time:14.0(Scan#:1318)

ssPeaks:169

vMode:Averaged 14.0-14.0(1317-1319) BasePeak:150(84817)

Mode:Averaged 15.3-15.3(1478-1480)

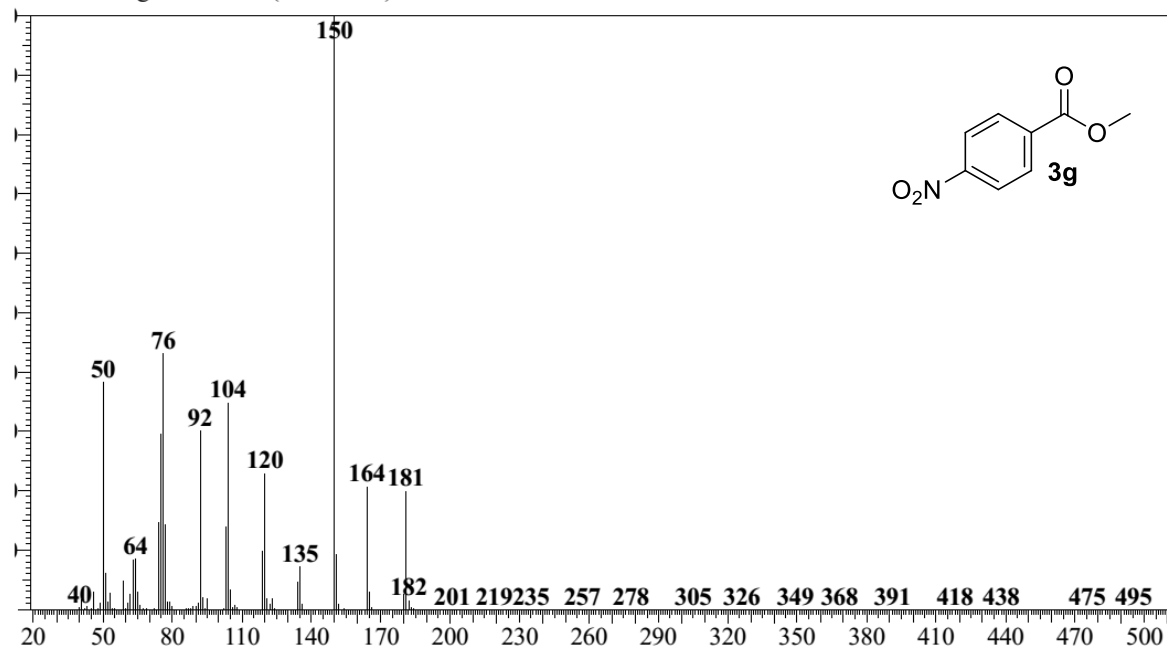

Methyl 4-chlorobenzoate (3h):

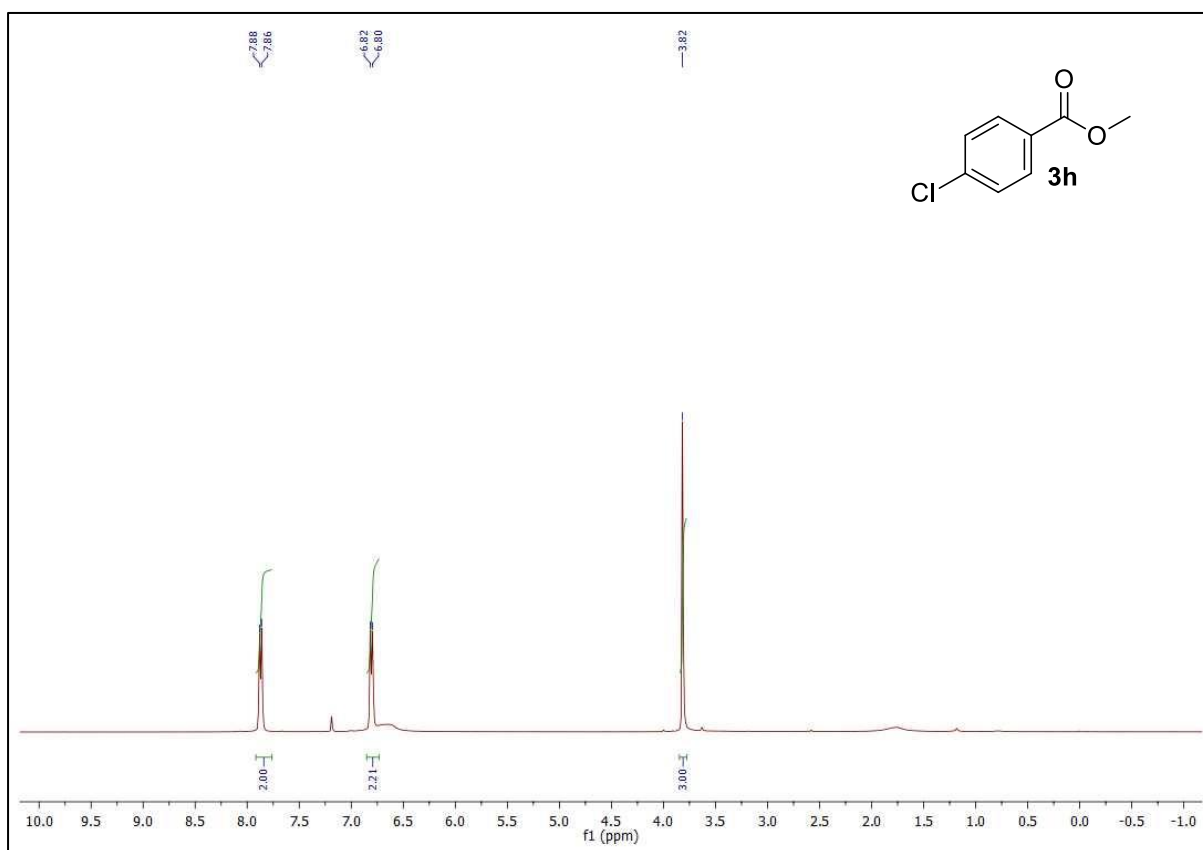

Line#:1 R.Time:5.2(Scan#:431)

MassPeaks:386

RawMode:Averaged 5.1-5.2(430-432) BasePeak:139(8286803)

BG Mode:Calc. from Peak

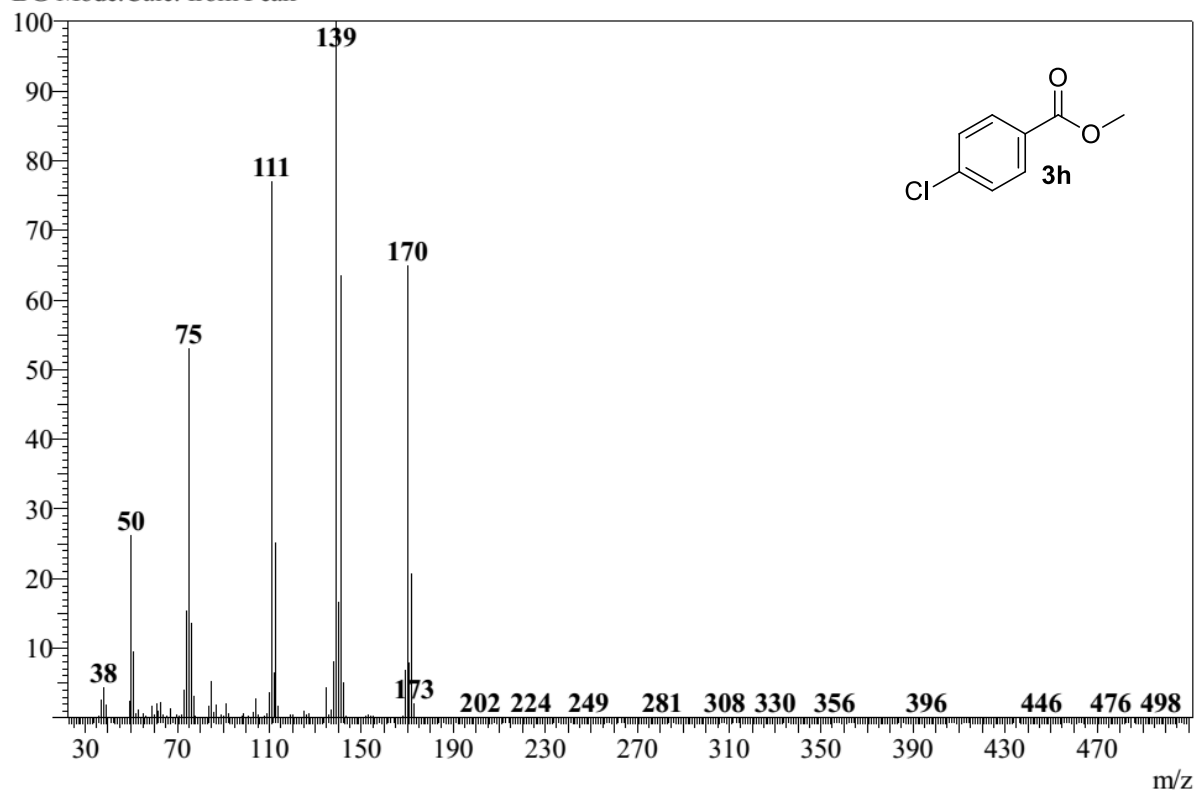

Methyl 4-methoxybenzoate (3i):

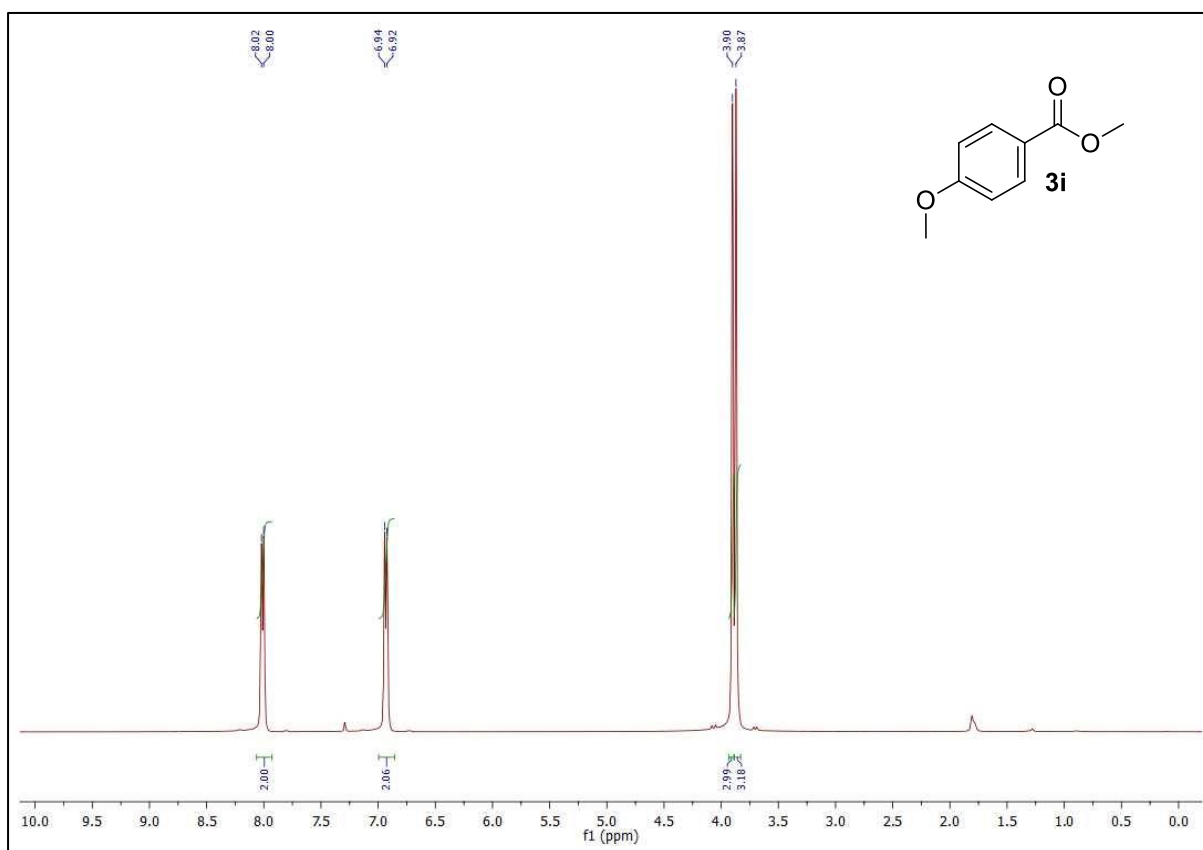

e#:1 R.Time:12.6(Scan#:1153)

ssPeaks:134

vMode:Averaged 12.6-12.6(1152-1154) BasePeak:135(218832)

Mode:Averaged 15.0-15.0(1438-1440)

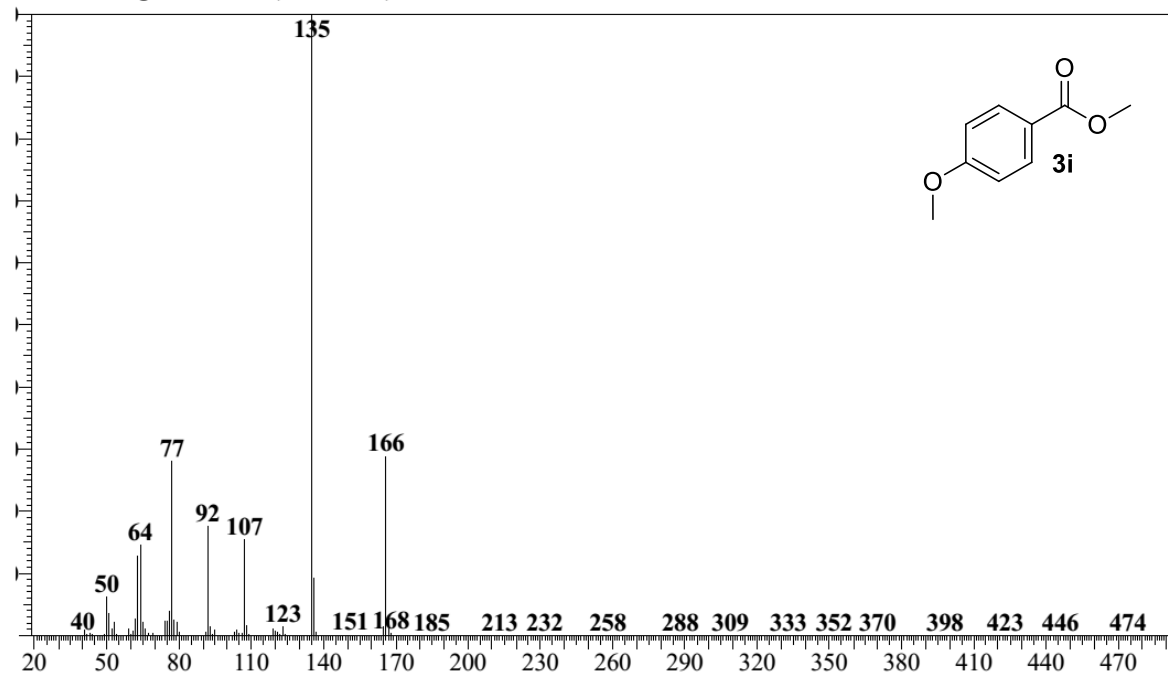

Catechol (3k):

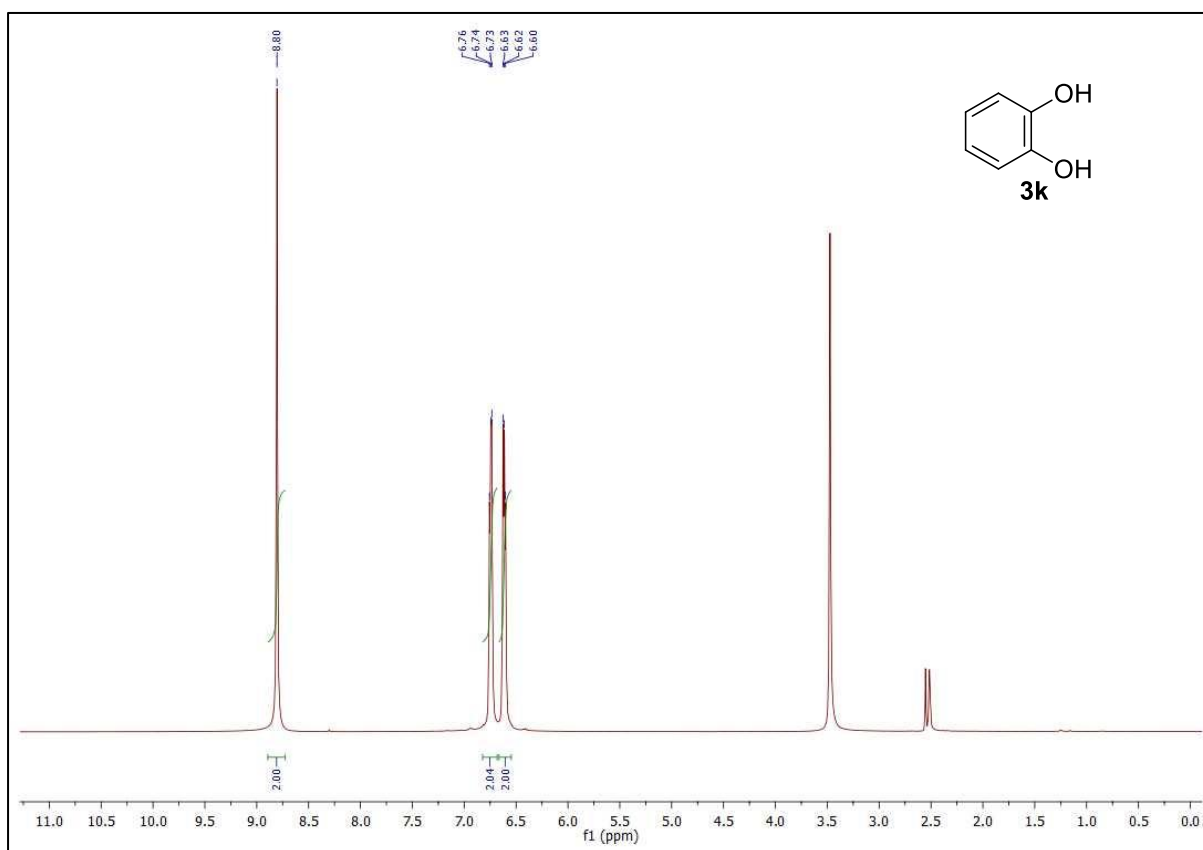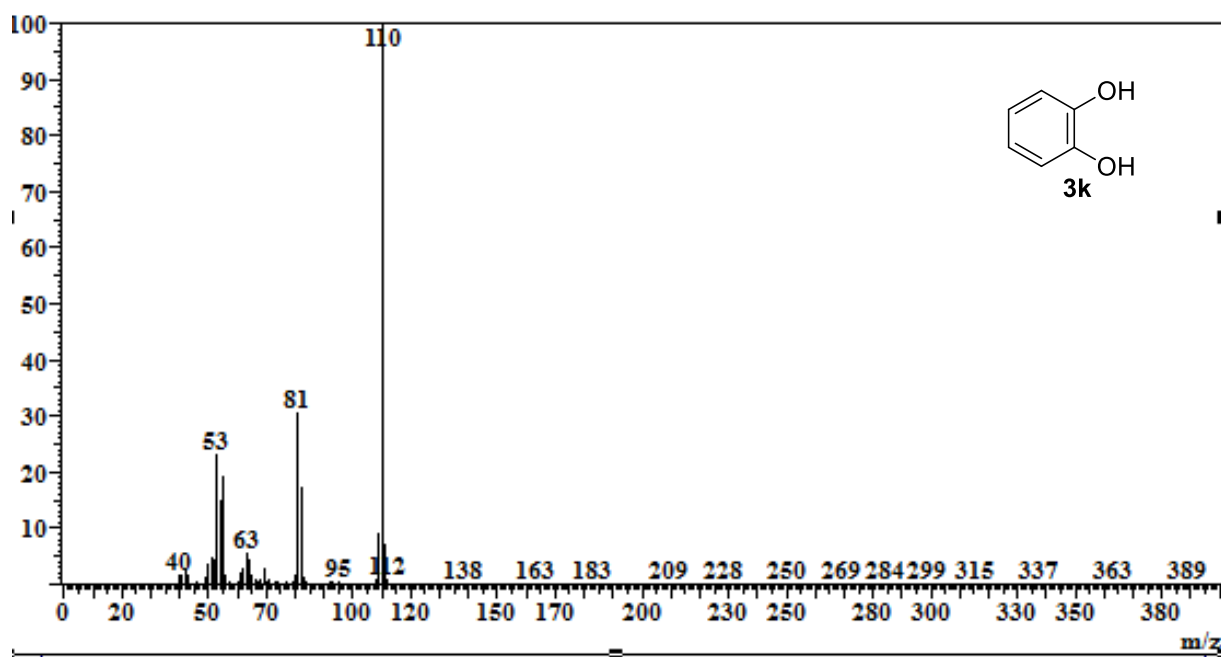

Ethyl benzoate (3p):

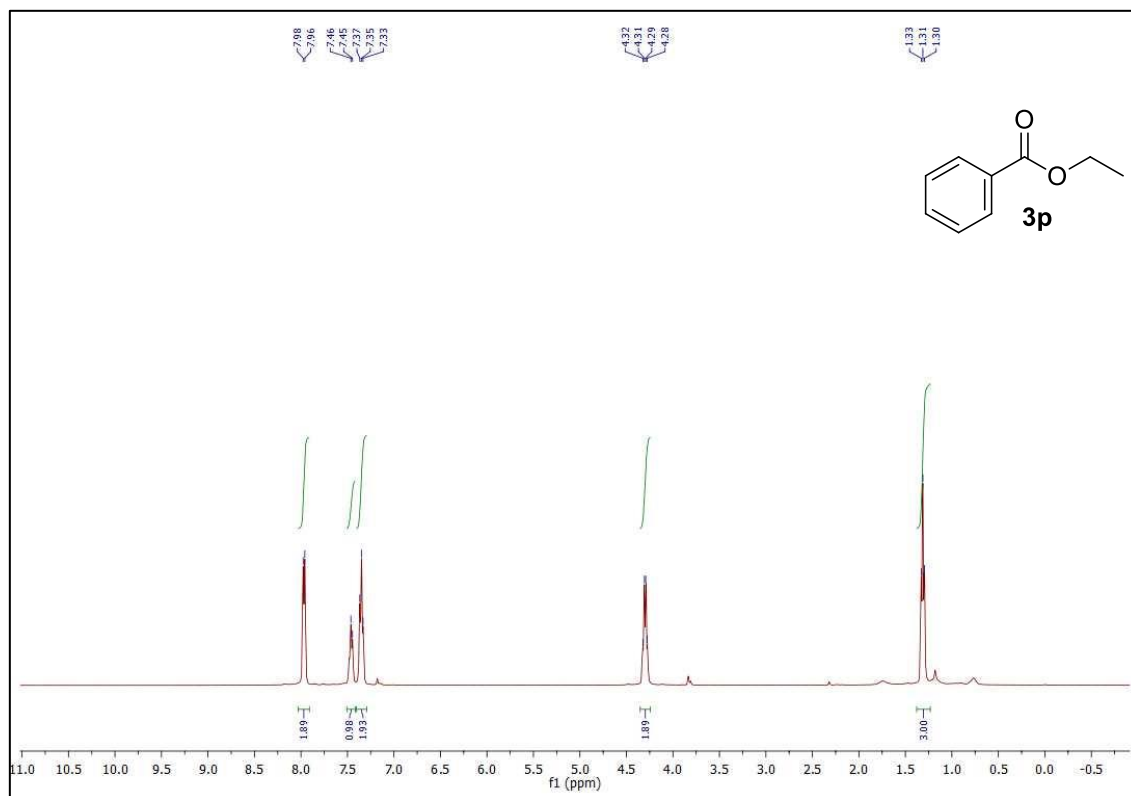

Line#:1 R.Time:3.9(Scan#:182)

MassPeaks:263

RawMode:Averaged 3.9-3.9(181-183) BasePeak:105(8328355)

BG Mode:Calc. from Peak

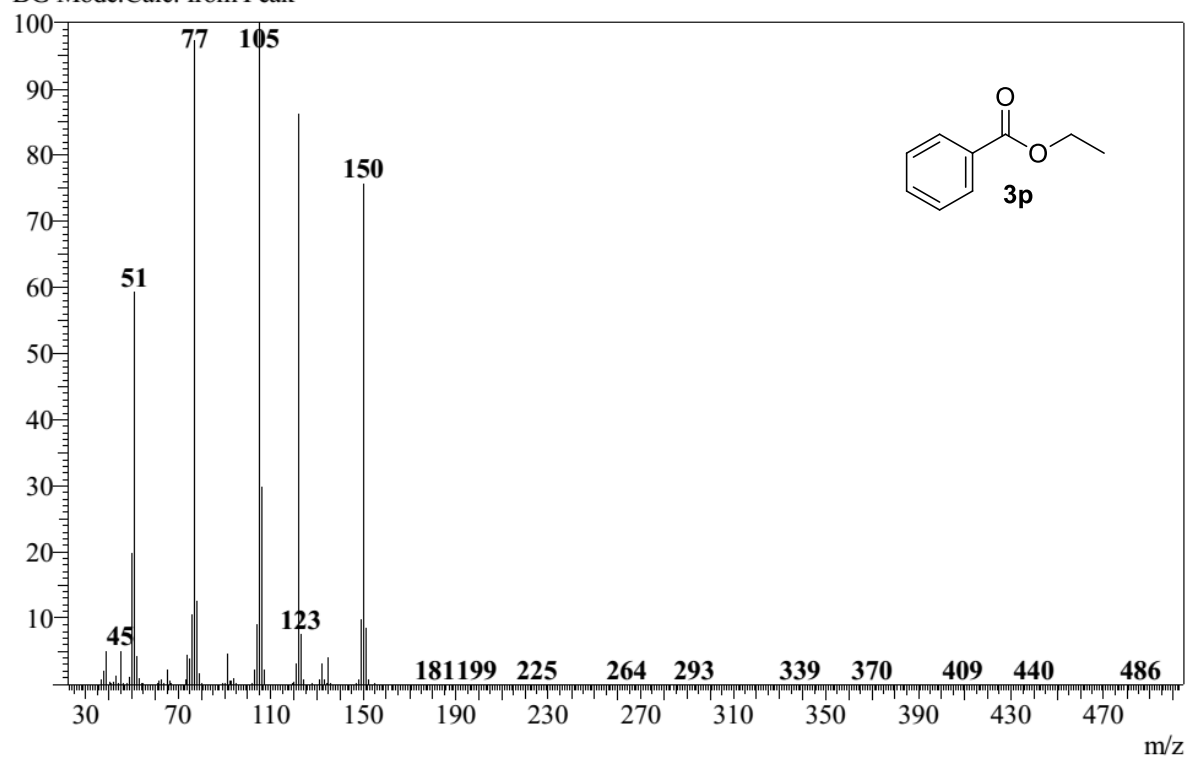



Butyl benzoate(3r):

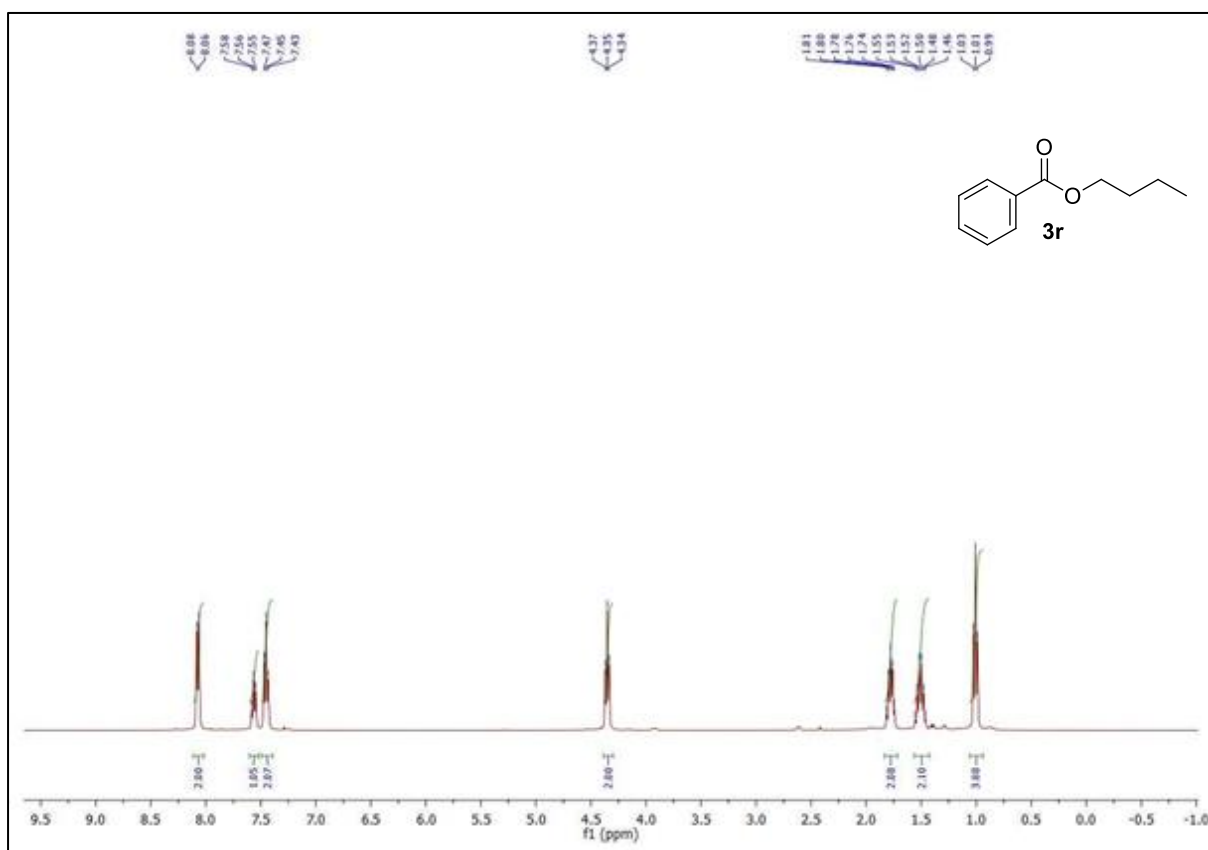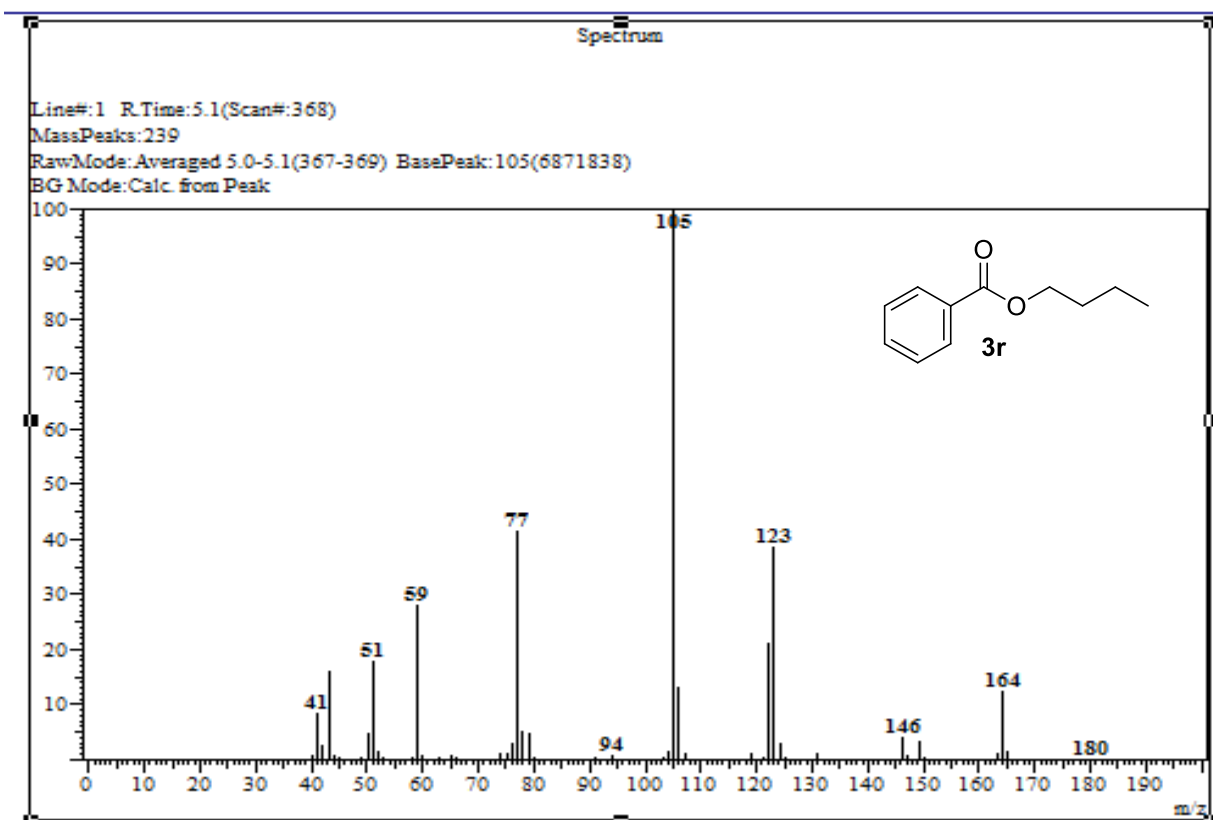

Isopropyl benzoate (3s):

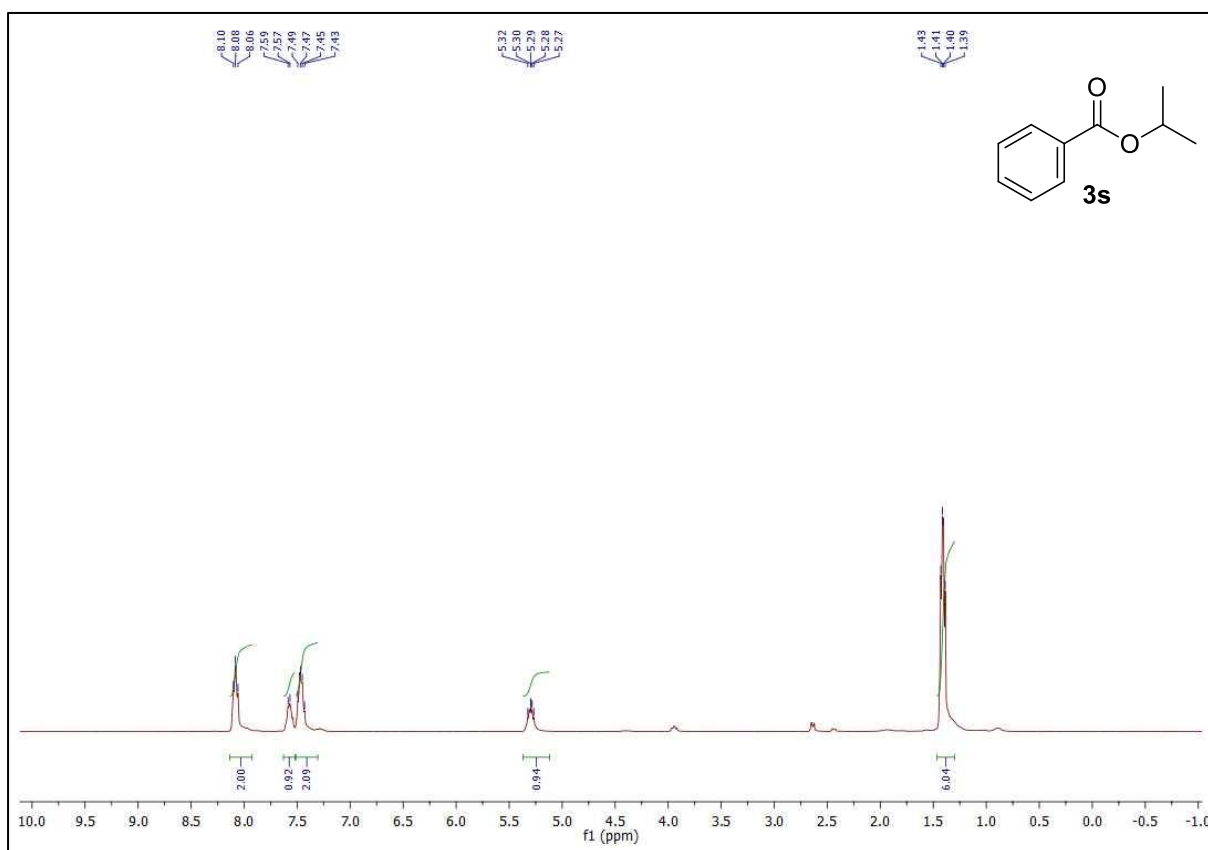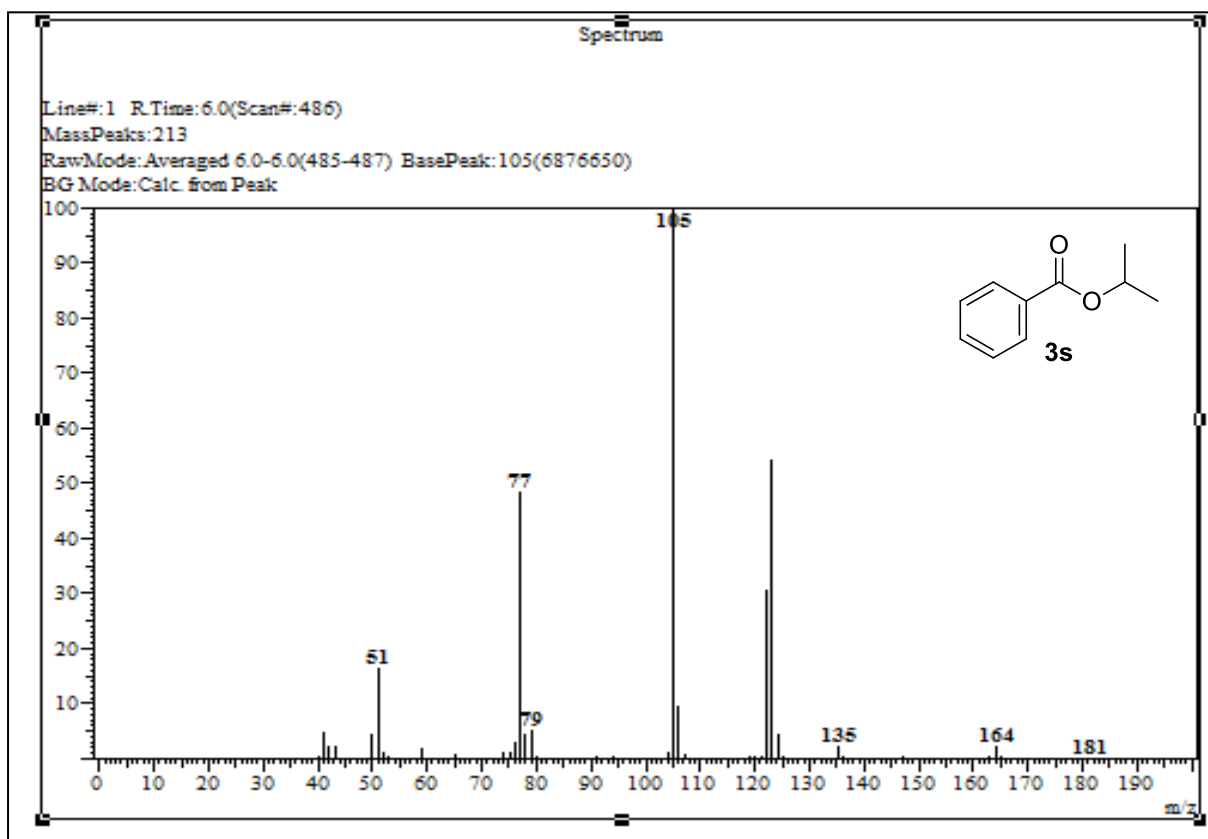

2-hydroxyethyl benzoate (3u):

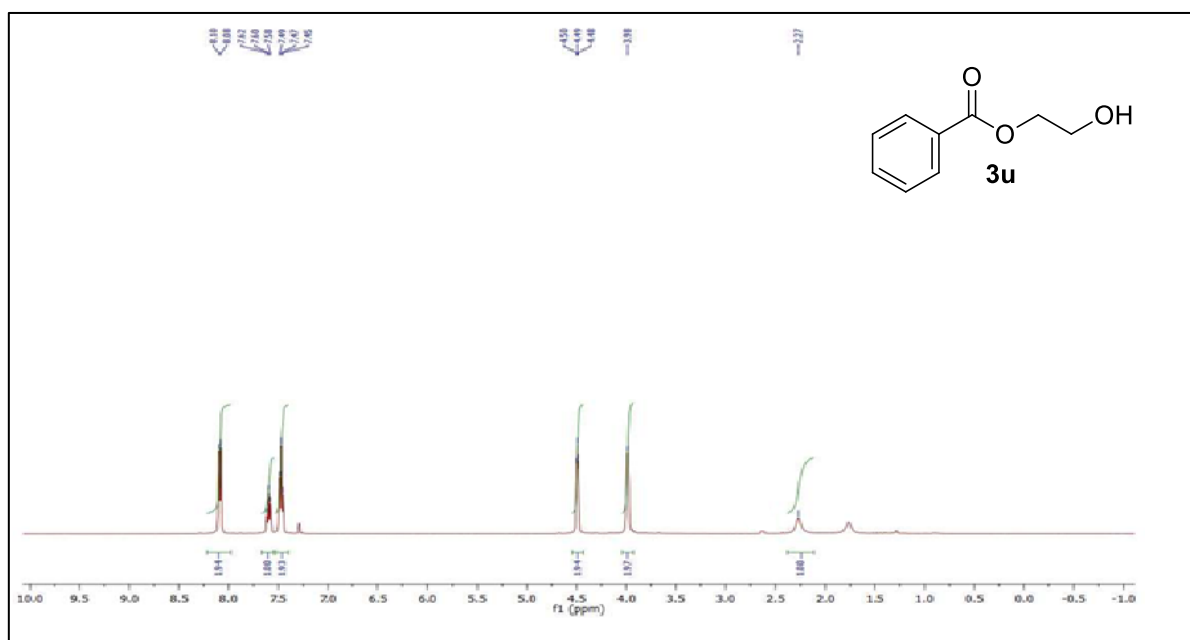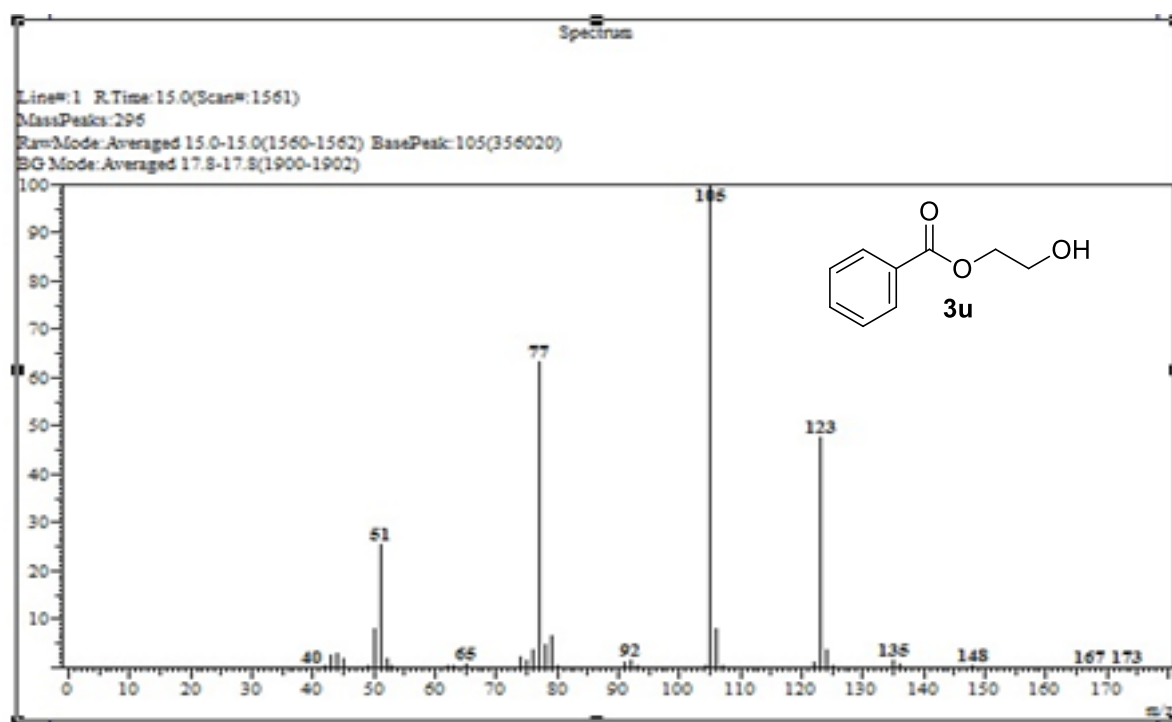

2-hydroxy ethyl 4-methyl benzoate (3v) :

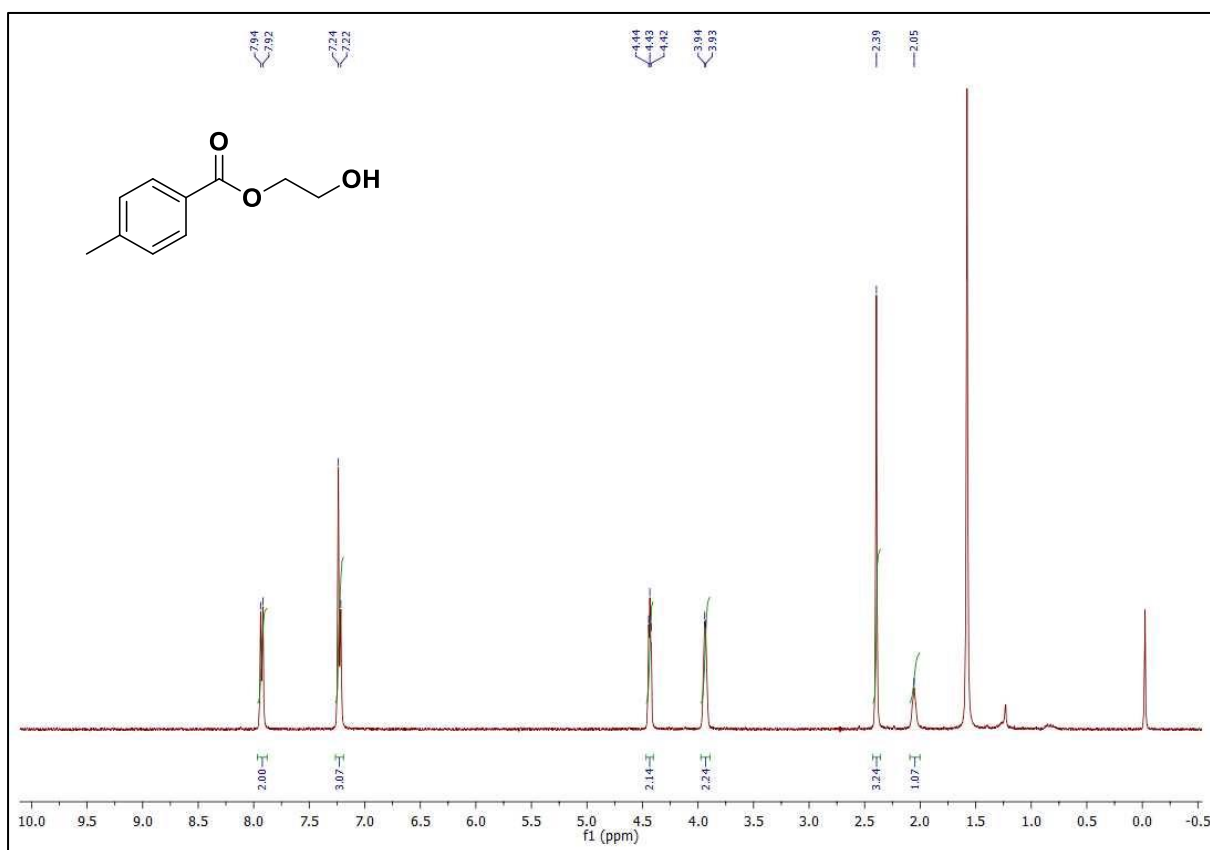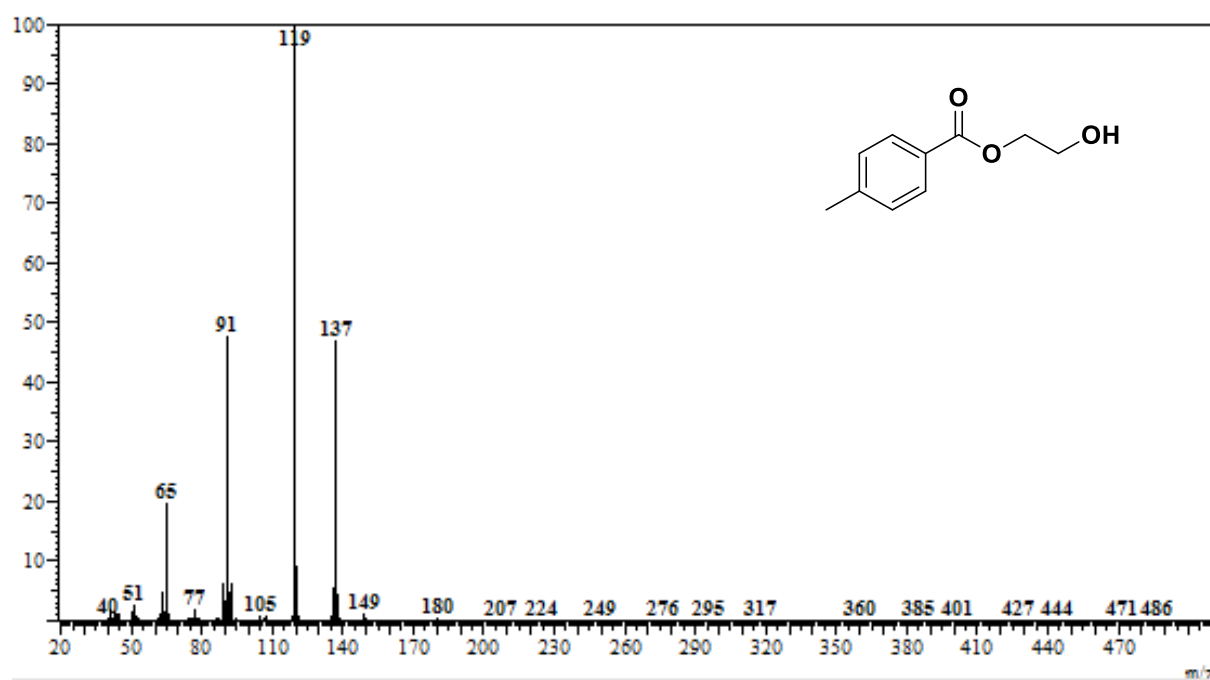

2-hydroxy ethyl 4-nitro benzoate (3w) :

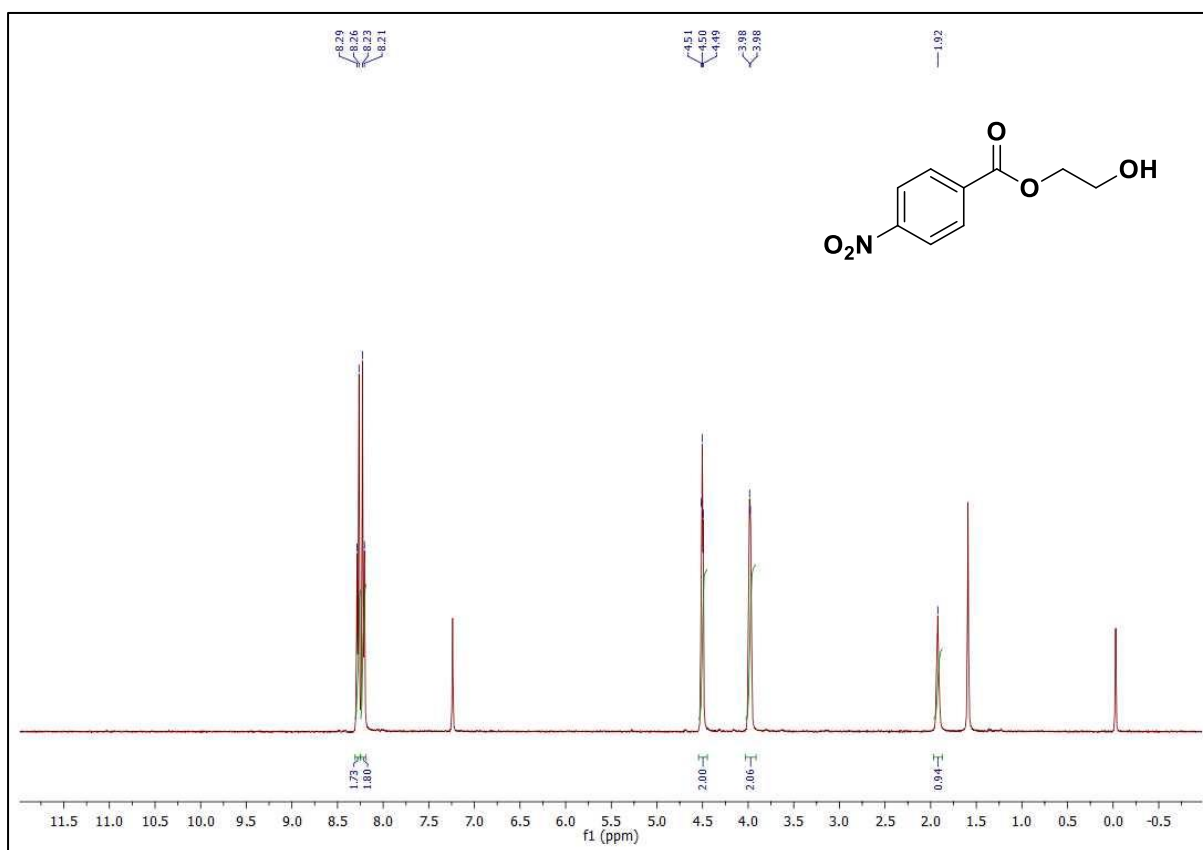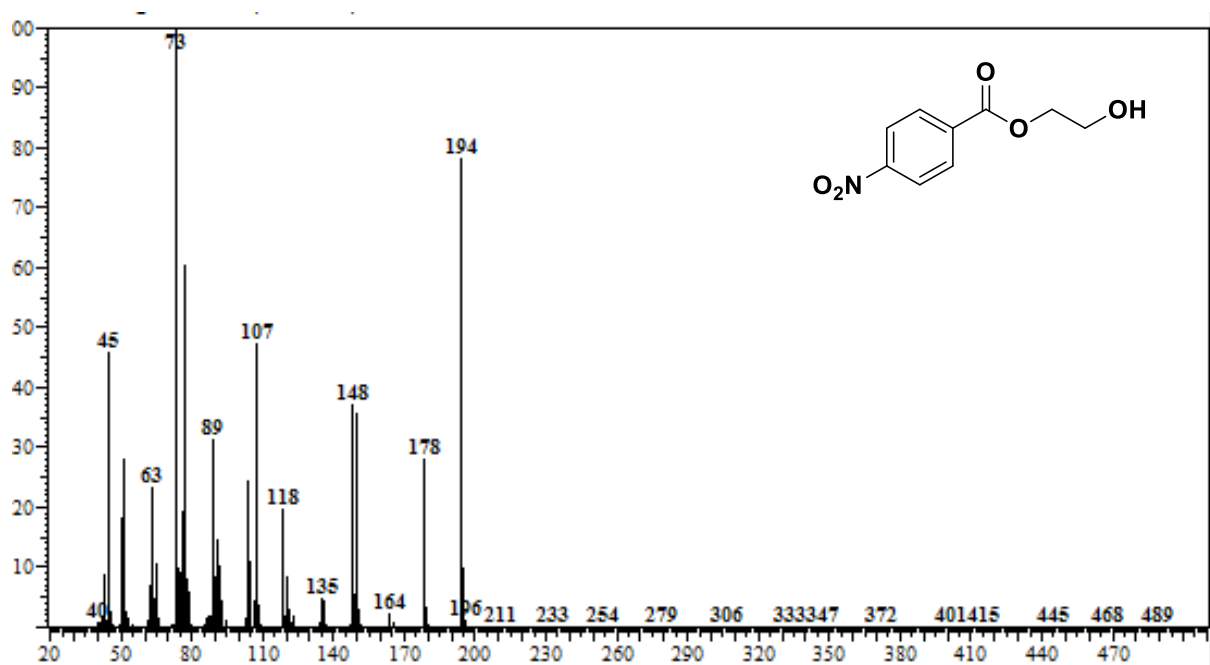

Supplement: c6nj03831j1.pdf [file c6nj03831j1.pdf]
